# Supplementary material for: A randomized controlled trial on the effect of a silver carboxymethylcellulose dressing on surgical site infections after breast cancer surgery
Source: PubMed Central journal article supplement (PMC5965831; doi:10.1371/journal.pone.0195715), 2018-05-23
Supplement: pone.0195715.s001.pdf [file pone.0195715.s001.pdf]

Study ID

Patient identification sticker

AQUACEL AG Surgical Study

*Outpatient visit (7-10 days post-op) – scoring form*

Date: \_\_\_\_\_

Physician: \_\_\_\_\_

Specialized nurse : \_\_\_\_\_

Dressing change : YES / NO (circle); if yes, after how many days: \_\_\_\_\_

CDC-criteria

|                                             | YES                      | NO                       |
|---------------------------------------------|--------------------------|--------------------------|
| 1. Purulent drainage from incision          | <input type="checkbox"/> | <input type="checkbox"/> |
| 2. Cultured                                 | <input type="checkbox"/> | <input type="checkbox"/> |
| Positive result (to fill out later)         | <input type="checkbox"/> | <input type="checkbox"/> |
| 3. Symptoms                                 |                          |                          |
| Pain or tenderness                          | <input type="checkbox"/> | <input type="checkbox"/> |
| Lokalized swelling                          | <input type="checkbox"/> | <input type="checkbox"/> |
| Erythema                                    | <input type="checkbox"/> | <input type="checkbox"/> |
| Heat                                        | <input type="checkbox"/> | <input type="checkbox"/> |
| Fever (>38°C)                               | <input type="checkbox"/> | <input type="checkbox"/> |
| 4. Deliberately opening of wound by surgeon | <input type="checkbox"/> | <input type="checkbox"/> |
| 5. Spontaneous wound dehiscence             | <input type="checkbox"/> | <input type="checkbox"/> |
| 6. Clinical signs of abcess/mastitis        | <input type="checkbox"/> | <input type="checkbox"/> |

Diagnosis of SSI by surgeon or attending physician (circle): JA / NEE

In case of SSI (suspicion): \_\_\_\_\_ superficial / deep (circle)

Start antibiotics (circle): \_\_\_\_\_ YES / NO

If yes, specify: \_\_\_\_\_; duration \_\_\_\_\_ days

Patient satisfaction: please rate the wound dressing (circle)

|                 |   |   |   |   |   |   |   |   |   |              |
|-----------------|---|---|---|---|---|---|---|---|---|--------------|
| 0               | 1 | 2 | 3 | 4 | 5 | 6 | 7 | 8 | 9 | 10           |
| complete        |   |   |   |   |   |   |   |   |   | complete     |
| dissatisfaction |   |   |   |   |   |   |   |   |   | satisfaction |
