# Supplementary material for: A randomized controlled trial on the effect of a silver carboxymethylcellulose dressing on surgical site infections after breast cancer surgery
Source: PLoS One. 2018 May 23;13(5):e0195715. doi: 10.1371/journal.pone.0195715 (PMC5965831; doi:10.1371/journal.pone.0195715)
Supplement: S2 File — (PDF) [file pone.0195715.s002.pdf]

\_\_\_\_\_

# AQUACEL AG Surgical Study

*Polibezzoek (7-10 dagen post-op) – score formulier*

# Patientensticker

Datum:

Arts:

mammacareverpleegkundige: \_\_\_\_\_

Verbandwissel : JA / NEE (omcirkel); zo ja, na hoeveel dagen: \_\_\_\_\_

CDC-criteria

JA    NEE

- |                                         |                          |                          |
|-----------------------------------------|--------------------------|--------------------------|
| 1. Pus uit incisie                      | <input type="checkbox"/> | <input type="checkbox"/> |
| 2. Wondkweek afgenomen                  | <input type="checkbox"/> | <input type="checkbox"/> |
| Positief (later in te vullen)           | <input type="checkbox"/> | <input type="checkbox"/> |
| 3. Symptomen                            |                          |                          |
| Pijn of gevoeligheid                    | <input type="checkbox"/> | <input type="checkbox"/> |
| Lokale zwelling                         | <input type="checkbox"/> | <input type="checkbox"/> |
| Roodheid                                | <input type="checkbox"/> | <input type="checkbox"/> |
| Warmte                                  | <input type="checkbox"/> | <input type="checkbox"/> |
| Koorts (>38)                            | <input type="checkbox"/> | <input type="checkbox"/> |
| 4. Openen van wond                      | <input type="checkbox"/> | <input type="checkbox"/> |
| 5. Spontane wonddehiscentie             | <input type="checkbox"/> | <input type="checkbox"/> |
| 6. Klinische tekenen van abces/mastitis | <input type="checkbox"/> | <input type="checkbox"/> |

Klinische diagnose wondinfectie door chirurg (omcirkel): JA / NEE

In het geval van (verdenking) wondinfectie: oppervlakkig / diep (circle)

Start antibiotica (omcirkel): JA / NEE

Zo ja, welke: \_\_\_\_\_; duur \_\_\_\_\_ dagen

Patiënttevredenheid: geef cijfer voor wondverband (omcirkel)

0      1      2      3      4      5      6      7      8      9      10

Volledig

Volledig

## Ontevreden

## Tevreden
